# Supplementary material for: ECLed – A Tool Supporting the Effective Use of the SNOMED CT Expression Constraint Language
Source: Research Square preprint supplement (doi:10.21203/rs.3.rs-6644476/v1), 2025-05-26
Supplement: Supplementary file 1 [file 9eb0f7683ff09a4f92ef0043.docx]

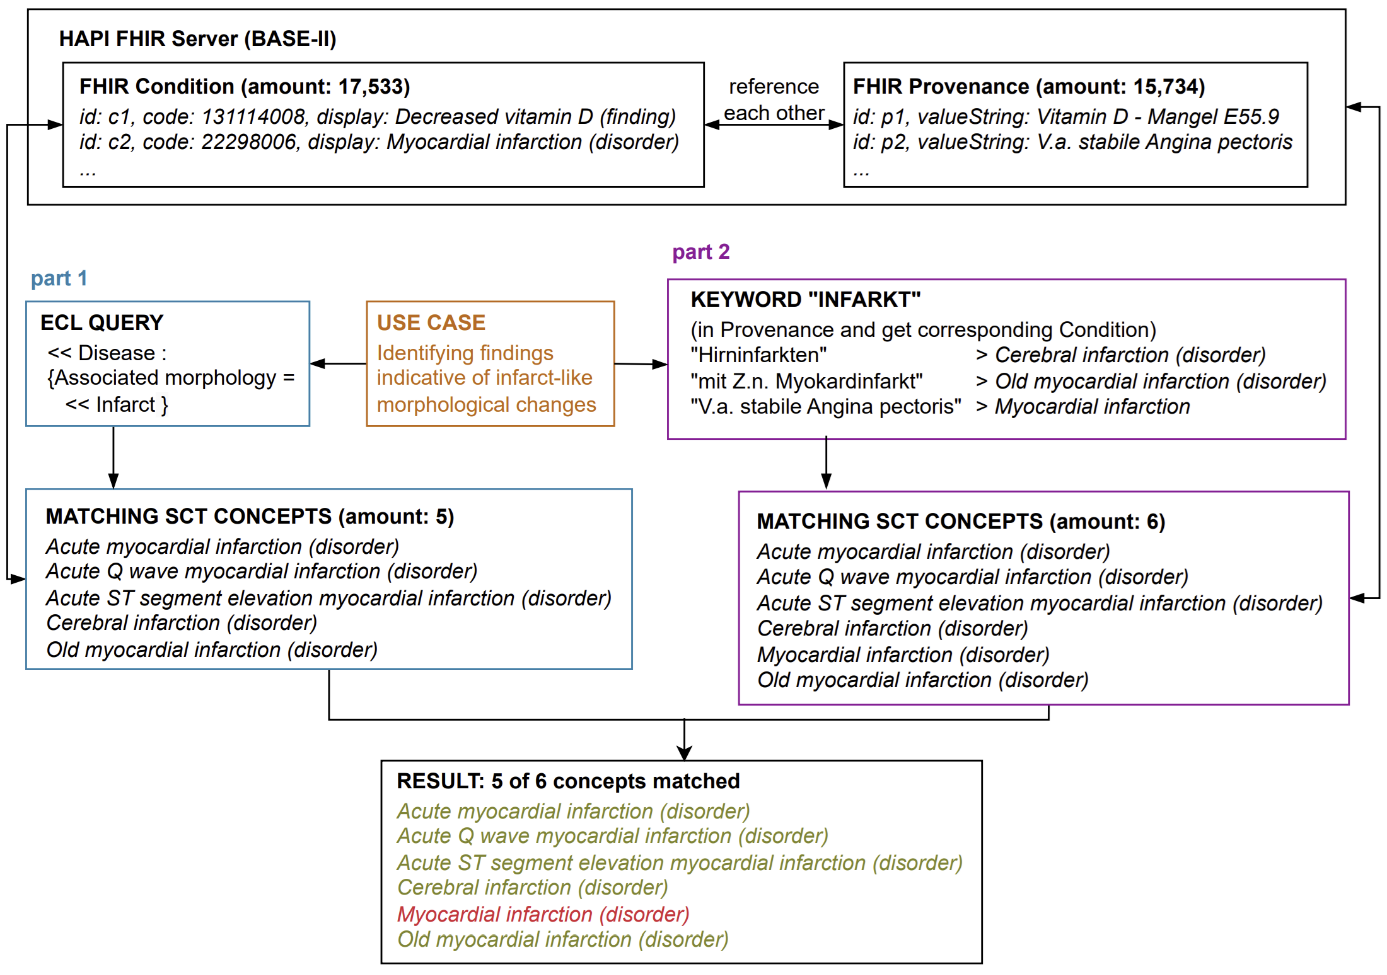


**Figure 1.** Comparison of Semantic and Keyword-Based Methods for Identifying Infarct-Associated Clinical Concepts in FHIR Data

**Real-World Validation Using SNOMED CT-Coded FHIR Data**

This figure illustrates two different approaches for identifying clinically relevant, infarct-associated conditions within a FHIR dataset (BASE-II) using SNOMED CT:

- **Part 1 – Semantic Query (left):**

A precisely formulated Expression Constraint Language (ECL) query leverages SNOMED CT relationships to extract disorders characterized by infarct-type morphological changes. This query yields five matching concepts.

- **Part 2 – Keyword Search (right):**

The keyword “Infarkt” (German for infarction) is searched within the textual content of *Provenance* entries. This method identifies six concepts in total.

- **Conclusion:**

Both methods identify five overlapping SNOMED CT concepts, including cerebral infarction. While the semantic ECL query ensures high precision, keyword-based extraction from narrative provenance text can uncover additional relevant conditions. Combining both approaches can improve completeness and accuracy in the identification of infarct-related clinical concepts from structured and unstructured healthcare data.
