# Supplementary material for: ECLed – A Tool Supporting the Effective Use of the SNOMED CT Expression Constraint Language
Source: Research Square preprint supplement (doi:10.21203/rs.3.rs-6644476/v1), 2025-05-26
Supplement: Supplementary file 2 [file adc9f86f2cfac5d1a44a6acd.docx]

**Validation Using Real-World ECL Queries**

|  | **ECL query** | **Major characteristics** |
| --- | --- | --- |
| **CORRECT ECL** | * | - Only focus concept (*) |
| >>!  40541001 |Acute pulmonary edema| | - Focus concept + constraint operator |
| < 19829001 |Disorder of lung|:  {116676008 |Associated morphology| = 79654002 |Edema|} | - 1 RoleGroup with 1 attribute relation |
| < 19829001 |Disorder of lung|:  {116676008 |Associated morphology| = << 79654002 |Edema|} | - Using constraint operator before attribute   value |
| < 404684003 |Clinical finding|: {* = 79654002 |Edema|} | - Using Any (*) as attribute |
| < 404684003 |Clinical finding|: {116676008 |Associated morphology| = *} | - Using Any (*) as attribute value |
| < 404684003 |Clinical finding|:  {363698007 |Finding site| = << 39057004 |Pulmonary valve structure| AND   116676008 |Associated morphology| = << 415582006 |Stenosis|} | - 1 RoleGroup with 2 attribute relation - Logical operator between relations: AND |
| < 404684003 |Clinical finding|:  {116676008 |Associated morphology| = << 55641003 |Infarct| OR  42752001 |Due to| = << 22298006 |Myocardial infarction| | - 1 RoleGroup with 2 attribute relation - Logical operator between relations: OR |
| < 404684003 |Clinical finding|:  {363698007 |Finding site| = << 39057004 |Pulmonary valve structure| AND  116676008 |Associated morphology| = << 415582006 |Stenosis|} AND  {363698007 |Finding site| = << 53085002 |Right ventricular structure| AND  116676008 |Associated morphology| = << 56246009 |Hypertrophy|} | - 2 RoleGroups with 2 attribute relation  - Logical operator between RoleGroups: AND |
| < 404684003 |Clinical finding|:  {363698007 |Finding site| = << 39057004 |Pulmonary valve structure| OR  116676008 |Associated morphology| = << 415582006 |Stenosis|} OR  {363698007 |Finding site| = << 53085002 |Right ventricular structure| OR  116676008 |Associated morphology| = << 56246009 |Hype} | - 2 RoleGroups with 2 attribute relation  - Logical operator between RoleGroups: OR |
| < 373873005 |Pharmaceutical / biologic product|:  411116001 |Has manufactured dose form (attribute)|= << 385268001 |Oral dose form (dose form)| | - 1 ungrouped attribute relation |
| < 763158003 |Medicinal product (product)|:  411116001 |Has manufactured dose form (attribute)| = << 385268001 |Oral dose form (dose form)| AND  {127489000 |Has active ingredient (attribute)| = << 372687004 |Amoxicillin (substance)| AND  1142135004 |Has presentation strength numerator value (attribute)| >= #250 AND  732945000 |Has presentation strength numerator unit (attribute)| = 258684004 |milligram (qualifier value)|} | - 1 ungrouped attribute relation  - 1 RoleGroup with 2 attribute relation  - Attribute relation with concrete value |
| < 763158003 |Medicinal product (product)|:  411116001 |Has manufactured dose form (attribute)|= << 385268001 |Oral dose form (dose form)| AND  {127489000 |Has active ingredient (attribute)| = << 372687004 |Amoxicillin (substance)| AND  1142135004 |Has presentation strength numerator value (attribute)| >= #250 AND  1142135004 |Has presentation strength numerator value (attribute)| <= #800 | - 1 ungrouped attribute relation  - 1 RoleGroup with 2 attribute relation  - Attribute relation with concrete value (min   and max value) |
| < 91723000 |Anatomical structure|:  R 363698007 |Finding site| = < 125605004 |Fracture of bone| | - Reverse attribute |
| < 404684003 |Clinical finding|:  {(363698007 |Finding site| = << 39057004 |Pulmonary valve structure| AND  116676008 |Associated morphology| = << 415582006 |Stenosis|) OR  42752001 |Due to| = << 1288045008|Well-differentiated neuroendocrine tumor (disorder)|} | - Multiple logical operators between  relations: AND / OR (brackets) |
| < 404684003 |Clinical finding|:  {363698007 |Finding site| = << 39057004 |Pulmonary valve structure| AND  (116676008 |Associated morphology| = << 415582006 |Stenosis| OR  42752001 |Due to| = << 1288045008|Well-differentiated neuroendocrine tumor (disorder)|)} | - Multiple logical operators between  relations: AND / OR (brackets) |
| < 404684003 |Clinical finding|:  {116676008 |Associated morphology| = ((<< 56208002 |Ulcer| AND << 50960005 |Hemorrhage|) MINUS << 26036001 |Obstruction|)} | - Multiple logical operators between attribute   values: AND / OR (brackets) |
| < 404684003 |Clinical finding|:  {116676008 |Associated morphology| = ((<< 56208002 |Ulcer| AND << 50960005 |Hemorrhage|) MINUS <<  26036001 |Obstruction|)} | - Multiple logical operators between attribute   values: AND / OR (brackets) |
| **INCORRECT ECL** | < 404684003 |Clinical finding|:  {363704007 |Procedure site| = << 39057004 |Pulmonary valve structure|} | - Use of a invalid attribute (*Procedure site*) in   the domain *Clinical finding* |
| < 404684003 |Clinical finding|:  {363698007 |Finding site| = << 39057004 |Pulmonary valve structure| AND  363698007 |Finding site| = << 53085002 |Right ventricular structure|} | - Violation of the cardinality of an attribute   (e.g., *Finding site*: [0..1]) – should therefore   be included in an additional RoleGroup |
| < 404684003 |Clinical finding|:  {363698007 |Finding site| = << 90734009 |Chronic|} | - Violation of an attribute's range through the   selection of an invalid attribute value (e.g.,   *Chronic*) |

**Note**:

The 18 syntactically and semantically correct ECL queries are taken from the official *Expression Constraint Language – Specification and Guide* [4] by SNOMED International, to demonstrate that *ECLed* can generate correct and precise ECL expressions. The three incorrect ECL queries, on the other hand, were intentionally created by us to illustrate that *ECLed* can detect and preventing errors.
